# Supplementary material
Source: publisher figshare collection journal article supplement (https://sage.figshare.com/ndownloader/files/45129683)
Supplement: Supplementary file 1 [file 45129683]

## Sheet: Sheet 1
Continent	AppName ID	Country/State	Coverage	Sponsor	Google Play Store URL	App Store URL	Exodus report available?	Privacy and policy document available?	Privacy and Policy document in English?
North America	401Health	USA, Rhode Island	State/province	Government	https://play.google.com/store/apps/details?id=com.ri.crushcovid	https://apps.apple.com/us/app/401health/id1511308593	Yes	Yes	Yes
Asia	Aarogya Setu	India	Country/region	Government	https://play.google.com/store/apps/details?id=nic.goi.aarogyasetu	https://apps.apple.com/in/app/aarogyasetu/id1505825357	Yes	Yes	Yes
Asia	Alhosn	UAE	Country/region	Government	https://play.google.com/store/apps/details?id=doh.health.shield	https://apps.apple.com/us/app/alhosn-uae/id1505380329	Yes	Yes	Yes
North America	ArriveCAN	Canada	Country/region	Government	https://play.google.com/store/apps/details?id=ca.gc.cbsa.coronavirus	https://apps.apple.com/us/app/arrivecan/id1505394667	Yes	Yes	Yes
North America	CANImmunize	Canada	Country/region	Multistakeholder	https://play.google.com/store/apps/details?id=ca.ohri.immunizeapp	https://apps.apple.com/us/app/canimmunize/id574951915	Yes	Yes	Yes
North America	CLEAR	USA	Institutions in network	Private	https://play.google.com/store/apps/details?id=com.clearme.clearapp	https://apps.apple.com/ca/app/clear-fast-touchless-access/id1436333504	Yes	Yes	Yes
North America	CommonHealth	USA	Institutions in network	Non-profit	https://play.google.com/store/apps/details?id=org.thecommonsproject.android.phr	Not Available	Yes	Yes	Yes
South America	ConecteSUS	Brazil	Country/region	Government	https://play.google.com/store/apps/details?id=br.gov.datasus.cnsdigital	https://apps.apple.com/ie/app/conecte-sus/id1045754608	Yes	Yes	No
Europe	Coronapas	Denmark	Country/region	Government	https://play.google.com/store/apps/details?id=dk.sum.ssicpas	https://apps.apple.com/us/app/coronapas/id1562290161	Yes	Yes	Yes
South America	Coronavirus UY	Uruguay	Country/region	Government	https://play.google.com/store/apps/details?id=uy.gub.salud.plancovid19uy&hl=en_US&gl=US	https://apps.apple.com/us/app/coronavirus-uy/id1503026854	Yes	Yes	No
Europe	COVID Certificate	Switzerland	Country/region	Government	https://play.google.com/store/apps/details?id=ch.admin.bag.covidcertificate.wallet&hl=en_US&gl=US	https://apps.apple.com/us/app/covid-certificate/id1565917320	Yes	Yes	Yes
Europe	COVIDCert NI	United Kingdom, Northern Ireland	State/province	Government	https://play.google.com/store/apps/details?id=net.hscni.covidcertni	https://apps.apple.com/gb/app/covidcert-ni/id1576492321	Yes	Yes	Yes
Asia	DHA	UAE, Dubai	State/province	Government	https://play.google.com/store/apps/details?id=ae.gov.dha.flagship	https://apps.apple.com/ae/app/dha-%D9%87%D9%8A%D8%A6%D8%A9-%D8%A7%D9%84%D8%B5%D8%AD%D8%A9-%D8%A8%D8%AF%D8%A8%D9%8A/id1437186269	Yes	Yes	Yes
Asia	e-Tǝbib	Azerbaijan	Country/region	Government	https://play.google.com/store/apps/details?id=az.gov.etabib	https://apps.apple.com/gb/app/e-tabib/id1514777201	Yes	Yes	Yes
Global	EarthMed GO	Global	Institutions in network	Non-profit	https://play.google.com/store/apps/details?id=org.un.medical.droidearthmed	https://apps.apple.com/us/app/earthmed-go/id1593801097	Yes	Yes	Yes
Africa	Egypt Health Passport	Egypt	Country/region	Government	https://play.google.com/store/apps/details?id=get.pid.egypt.health.passport&hl=en_US&gl=US	https://apps.apple.com/us/app/egypt-health-passport-%D8%A7%D8%B7%D9%85%D8%A6%D9%86/id1576307186	Yes	Yes	Yes
Asia	EHTERAZ	Qatar	Country/region	Government	https://play.google.com/store/apps/details?id=com.moi.covid19&hl=en_US&gl=US	https://apps.apple.com/us/app/ehteraz/id1507150431	Yes	Yes	Yes
Europe	GHA COVID Pass	Gibraltar	Country/region	Government	https://play.google.com/store/apps/details?id=com.gha.gibraltarvaccineapp&hl=en_US&gl=US	https://apps.apple.com/es/app/gha-covid-pass-gibraltar/id1569792013?l=en	Yes	Yes	Yes
North America	Healthy Together	USA	Institutions in network	Private	https://play.google.com/store/apps/details?id=co.twenty.stop.spread&hl=en_US&gl=US	https://apps.apple.com/us/app/healthy-together/id1507570835	Yes	Yes	Yes
North America	HMH Well	USA	Institutions in network	Non-profit	https://play.google.com/store/apps/details?id=com.hackensack.umc&hl=en_US&gl=US	https://apps.apple.com/us/app/hmh-well/id978484385	Yes	Yes	Yes
Asia	Immune	Kuwait	Country/region	Government	https://play.google.com/store/apps/details?id=com.mohkuwait.immune&hl=en_US&gl=US	https://apps.apple.com/kw/app/immune-%D9%85%D9%86%D8%A7%D8%B9%D8%A9/id1558661183	Yes	Yes	Yes
Europe	immuny	Germany	Institutions in network	Multistakeholder	https://play.google.com/store/apps/details?id=de.immuny&hl=en_US&gl=US	https://apps.apple.com/us/app/immuny/id1559528258	Yes	Yes	No
North America	LA Wallet	USA, Louisiana	State/province	Government	https://play.google.com/store/apps/details?id=gov.la.omv.lawallet&hl=en_US&gl=US	https://apps.apple.com/us/app/la-wallet/id1386930269	Yes	Yes	Yes
Asia	LeaveHomeSafe	Hong Kong	Country/region	Government	https://play.google.com/store/apps/details?id=hk.gov.ogcio.leavehomesafe&hl=en_US&gl=US	https://apps.apple.com/us/app/leavehomesafe/id1536377801	Yes	Yes	Yes
Europe	Life Fits Home	Turkey	Country/region	Government	https://play.google.com/store/apps/details?id=tr.gov.saglik.hayatevesigar&hl=en_US&gl=US	Not Available	Yes	Yes	Yes
Europe	mojelKP	Poland	Country/region	Government	https://play.google.com/store/apps/details?id=pl.gov.cez.mojeikp&hl=en_US&gl=US	https://apps.apple.com/pt/app/mojeikp-zaloguj-si%C4%99-do-zdrowia/id1557426960?l=en	Yes	Yes	No
North America	My Bindle	USA	Institutions in network	Private	https://play.google.com/store/apps/details?id=com.bindlesystems.holderapp&hl=en_US&gl=US	https://apps.apple.com/us/app/my-bindle/id1527744348	Yes	Yes	Yes
North America	myColorado	USA, Colorado	State/province	Government	https://play.google.com/store/apps/details?id=com.soc.mycolorado&hl=en_US&gl=US	https://apps.apple.com/us/app/mycolorado/id1447566714	Yes	Yes	Yes
Asia	MySejahtera	Malaysia	Country/region	Government	https://play.google.com/store/apps/details?id=my.gov.onegovappstore.mysejahtera&hl=en_US&gl=US	https://apps.apple.com/us/app/mysejahtera/id1504055630	Yes	Yes	Yes
North America	Navus Health	USA	Institutions in network	Private	https://play.google.com/store/apps/details?id=com.navushealth&hl=en_US&gl=US	https://apps.apple.com/us/app/navushealth/id1582382042	Not Available	Yes	Yes
Europe	NHS App	United Kingdom	Country/region	Government	https://play.google.com/store/apps/details?id=com.nhs.online.nhsonline&hl=en_US&gl=US	https://apps.apple.com/gb/app/nhs-app/id1388411277	Yes	Yes	Yes
North America	NLVaxPass	Canada, Newfoundland & Labrador	State/province	Government	https://play.google.com/store/apps/details?id=ca.nl.gov.nlvaxpassandroid&hl=en_US&gl=US	https://apps.apple.com/us/app/nlvaxpass/id1587967358	Yes	Yes	Yes
North America	NYC COVID SAFE	USA, New York	City	Government	https://play.google.com/store/apps/details?id=gov.nyc.doitt.covidsafe&hl=en_US&gl=US	https://apps.apple.com/th/app/nyc-covid-safe/id1565213506	Yes	Yes	Yes
North America	NYS Excelsior Pass Wallet	USA, New York	State/province	Government	https://play.google.com/store/apps/details?id=gov.ny.its.healthpassport.wallet&hl=en_US&gl=US	https://apps.apple.com/us/app/nys-excelsior-pass-wallet/id1552933587	Yes	Yes	Yes
Asia	Pak Vaccination Pass	Pakistan	Country/region	Government	https://play.google.com/store/apps/details?id=pk.gov.nadra.nims.certificate&hl=en_US&gl=US	https://apps.apple.com/us/app/pak-covid-19-vaccination-pass/id1568161682	Yes	Yes	Yes
Asia	PC-Covid Viet Nam	Vietnam	Country/region	Government	https://play.google.com/store/apps/details?id=com.mic.bluezone&hl=en_US&gl=US	https://apps.apple.com/us/app/pc-covid-viet-nam/id1508062685	Yes	Yes	No
Asia	PeduliLindungi	Indonesia	Country/region	Government	https://play.google.com/store/search?q=pedulilindungi&c=apps&hl=en_US&gl=US	https://apps.apple.com/us/app/pedulilindungi/id1504600374	Yes	Yes	Yes
North America	PocketVAX	USA	Institutions in network	Private	https://play.google.com/store/apps/details?id=com.pocketvax&hl=en_US&gl=US	https://apps.apple.com/us/app/pocket-vax/id1512174278	Yes	Not Available	Not Available
Australia	Service NSW	Australia, New South Wales	State/province	Government	https://play.google.com/store/apps/details?id=au.gov.nsw.service&hl=en_US&gl=US	https://apps.apple.com/au/app/service-nsw/id577283433	Yes	Yes	Yes
North America	Siqi	USA	Institutions in network	Private	https://play.google.com/store/apps/details?id=com.unitedsolutions.siqi&hl=en_US&gl=US	https://apps.apple.com/us/app/siqi/id1549290677	Yes	Not Available	Not Available
Asia	Surokkha	Bangladesh	Country/region	Government	https://play.google.com/store/apps/details?id=com.codersbucket.surokkha_app&hl=en_US&gl=US	Not Available	Yes	Yes	Yes
Asia	Tarassud+	Oman	Country/region	Government	https://play.google.com/store/apps/details?id=om.gov.moh.tarassudapplication&hl=en_US&gl=US	https://apps.apple.com/us/app/tarassud/id1502105746	Yes	Yes	Yes
Asia	Tawakkalna (Covid-19 KSA)	Saudi Arabia	Country/region	Government	https://play.google.com/store/apps/details?id=sa.gov.nic.tawakkalna&hl=en_US&gl=US	https://apps.apple.com/us/app/tawakkalna-covid-19-ksa/id1506236754	Yes	Yes	Yes
Europe	Tečka	Czech Republic	Country/region	Government	https://play.google.com/store/apps/details?id=cz.nakit.eocko.wallet	https://apps.apple.com/tt/app/te%C4%8Dka/id1568446392	Yes	Yes	No
Europe	TousAntiCovid	France	Country/region	Government	https://play.google.com/store/apps/details?id=fr.gouv.android.stopcovid	https://apps.apple.com/us/app/tousanticovid/id1511279125	Yes	Yes	No
Asia	TraceTogether	Singapore	Country/region	Government	https://play.google.com/store/apps/details?id=sg.gov.tech.bluetrace	https://apps.apple.com/us/app/tracetogether/id1498276074	Yes	Yes	Yes
North America	United Airlines	USA	Institutions in network	Private	https://play.google.com/store/apps/details?id=com.united.mobile.android&hl=en_US&gl=US	https://apps.apple.com/us/app/united-airlines/id449945214	Yes	Yes	Yes
North America	VaxiCode	Canada, Quebec	State/province	Government	https://play.google.com/store/apps/details?id=ca.quebec.vaccandroid	https://apps.apple.com/ca/app/vaxicode/id1571692711	Yes	Yes	No
Asia	หมอพร้อม	Thailand	Country/region	Government	https://play.google.com/store/apps/details?id=com.mor.promplus&hl=th&gl=US	https://apps.apple.com/mv/app/หมอพร-อม/id1559337829	Yes	Yes	Yes
